# Supplementary material
Source: PubMed Central journal article supplement (PMC2688993)
Supplement: 0900621106_0900621106SI.pdf [file 0900621106_0900621106SI.pdf]

# Supporting Information

Ayyoub et al. 10.1073/pnas.0900621106

## SI Materials and Methods

**Generation of MTreg Clonal Populations and Assessment of Suppressive Functions.** Clonal MTreg populations were generated by limiting dilution culture of ex vivo-sorted CD45RA<sup>-</sup>CD25<sup>+</sup>CD127<sup>low</sup>CD4<sup>+</sup> T cells with irradiated feeder cells, phytohemagglutinin (PHA), and IL-2. Suppressive function was assessed by coculture of carboxyfluorescein diacetate succinimidyl ester (CFSE)-labeled CD4<sup>+</sup> responders ( $2 \times 10^4$

per well) with suppressors at a cell ratio of 1:1 in the presence of  $2 \times 10^4$  per well irradiated allogeneic CD14<sup>+</sup> cells and PHA as described previously (1). Growth (assessed by CFSE dilution, 100 - % undivided cells) of wells with suppressor cells (experimental group) was compared with that of wells without suppressors (control). The percentage of suppression was determined as follows:  $100 - (\text{growth of experimental group} / \text{growth of control}) \times 100$ .

1. Valmori D, Merlo A, Souleimanian NE, Hesdorffer CS, Ayyoub M (2005) A peripheral circulating compartment of natural naive CD4 Tregs. *J Clin Invest* 115:1953–1962.

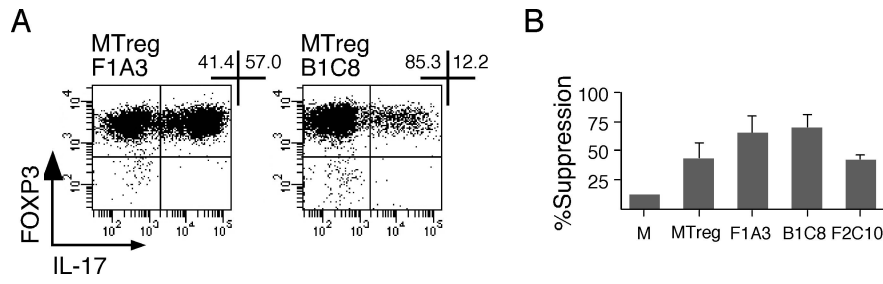

**Fig. S1.** Assessment of suppressive function of Treg-derived clonal populations. (A) Ex vivo-sorted MTregs were cloned under limiting dilution conditions. Obtained clonal populations were stimulated for 4 h with PMA/ionomycin, stained with anti-FOXP3 and anti-IL-17 antibodies, and analyzed by flow cytometry. Dot plots for 2 clones obtained from 2 donors are shown. (B) Suppressive function of MTreg clones F1A3 and B1C8, of a control Treg FOXP3<sup>+</sup>IL-17<sup>-</sup> clone (F2C10), and of ex vivo-sorted M and MTreg populations, used as internal controls, was assessed by coculture of CFSE-labeled responders with suppressors (cell ratio 1:1) in the presence of monocytes and PHA, as detailed in the *SI Materials and Methods*.
